# Supplementary material for: Tissue Engineering in Animal Models for Urinary Diversion: A Systematic Review
Source: PLOS journal article supplement (doi:10.1371/journal.pone.0098734), 2014-06-25

### Inclusion and exclusion in EROS

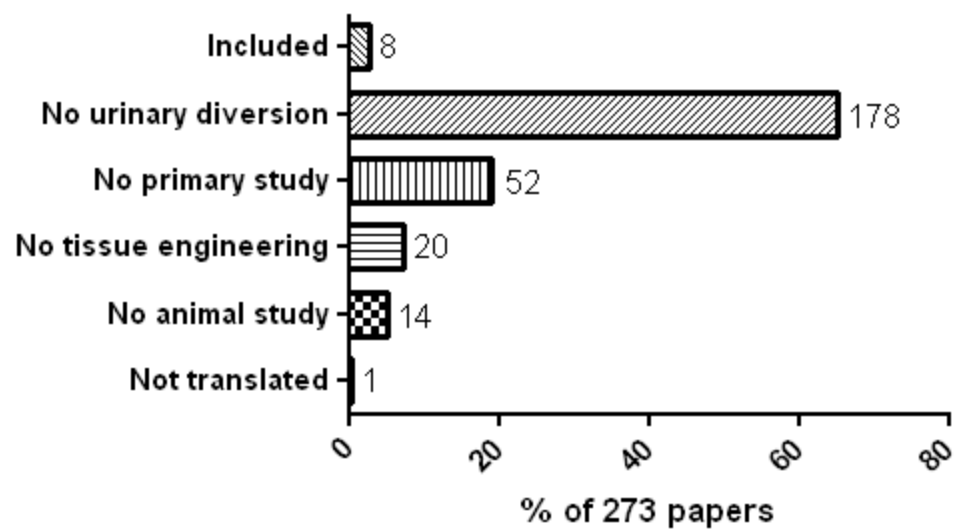

Supplement: S1 (10.1371/journal.pone.0098734.s001) [file journal.pone.0098734.s001]
